# Supplementary material for: ((1H-tetrazol-5-yl) methyl) pyridine-based metal coordination complexes: in situ tetrazole synthesis, crystal structures, luminescence properties
Source: Royal Society of Chemistry journal article supplement (doi:10.1039/c4ce01981d), 2014-12-15
Supplement: c4ce01981d1.pdf [file c4ce01981d1.pdf]

## Supporting Information

### ((1-H-tetrazol-5-yl)methyl)pyridine -based Metal Coordination Complexes: In Situ Syntheses, Crystal Structures, Luminescent Properties

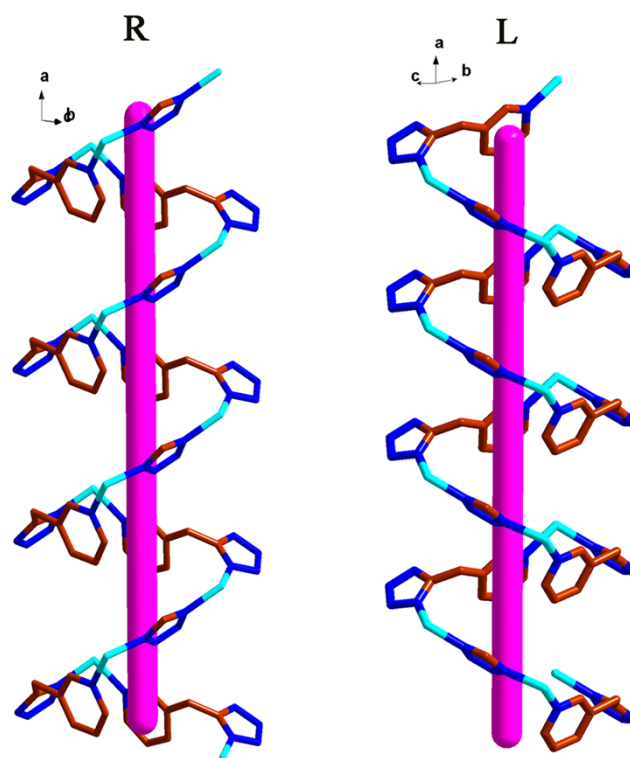

**Figure S1<sub>1</sub>.** The R & L helical chains in complex **2**. right: the R helical chain; left: the L helical chain.

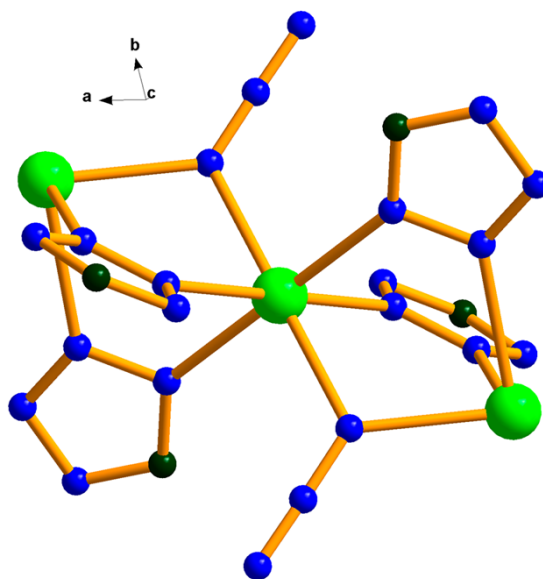

**Figure S1<sub>2</sub>.** The trinuclear  $[\text{Cd}_3(\text{N}_3)_2]$  building unit of complex **3**, C atoms were omitted for clear.

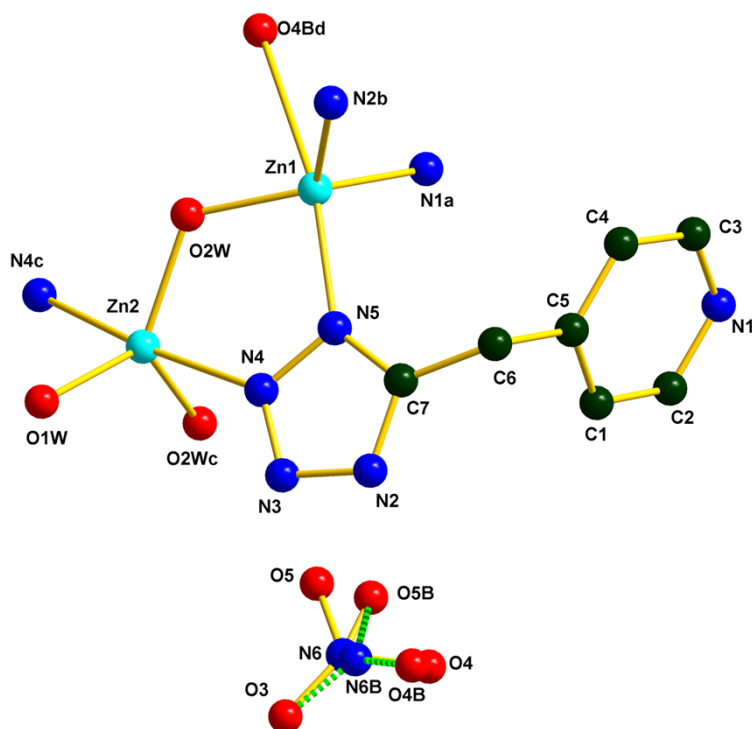

**Figure S1<sub>3</sub>.** View of the disordered units of complex **4**. Complex **4** exhibits 1:1 disorder of the free  $\text{NO}_3^-$  anions existing in the channels of complex **4**. The disorder is created by the presence of a crystallographic mirror plane or a two-fold axis.

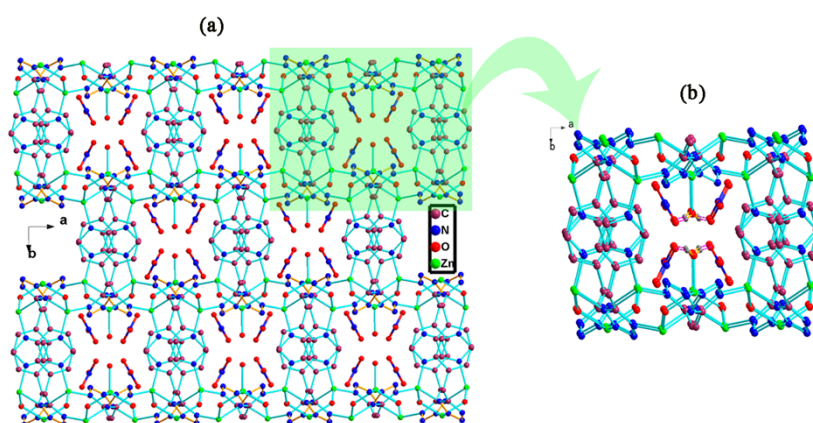

**Figure S1<sub>4</sub>.** (a) View of 3D MOF with free  $\text{NO}_3^-$  anions situated in channels along the  $c$ -axis of complex 4; (b) hydrogen bond between free  $\text{NO}_3^-$  anions and  $\text{O1W}$ .

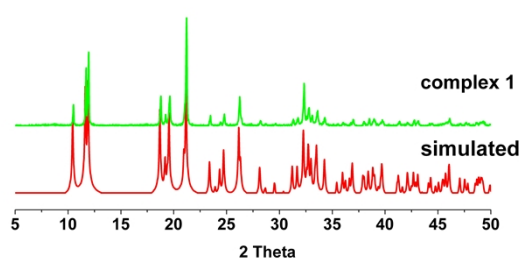

**Figure S2<sub>1</sub>.** Powder XRD: Patterns of simulated and as-prepared of 1.

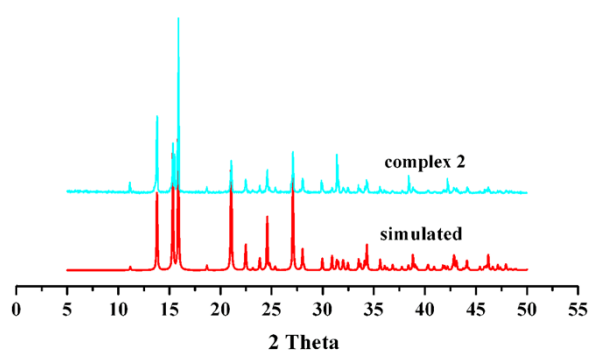

**Figure S2<sub>2</sub>.** Powder XRD: Patterns of simulated and as-prepared of 2.

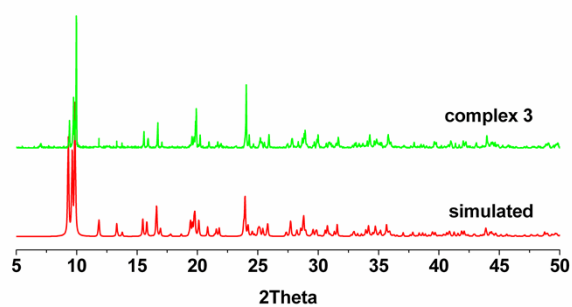

**Figure S2<sub>3</sub>.** Powder XRD: Patterns of simulated and as-prepared of **3**.

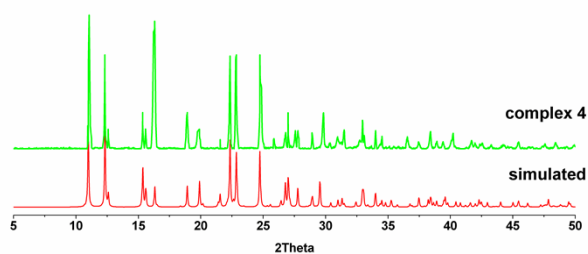

**Figure S2<sub>4</sub>.** Powder XRD: Patterns of simulated and as-prepared of **4**.

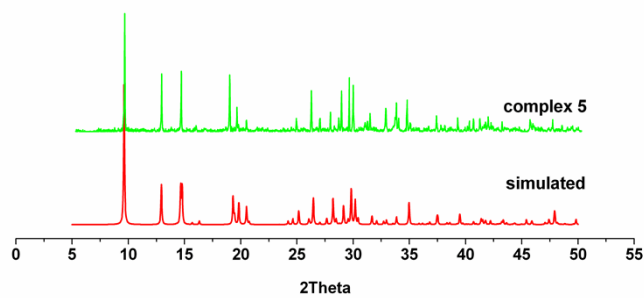

**Figure S2<sub>5</sub>.** Powder XRD: Patterns of simulated and as-prepared of **5**.

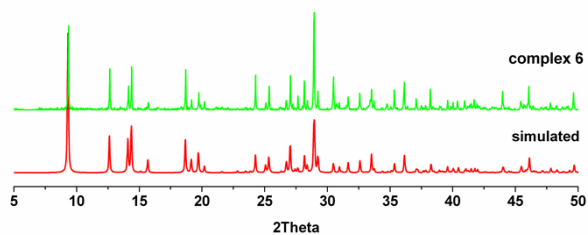

**Figure S2<sub>6</sub>.** Powder XRD: Patterns of simulated and as-prepared of **6**.

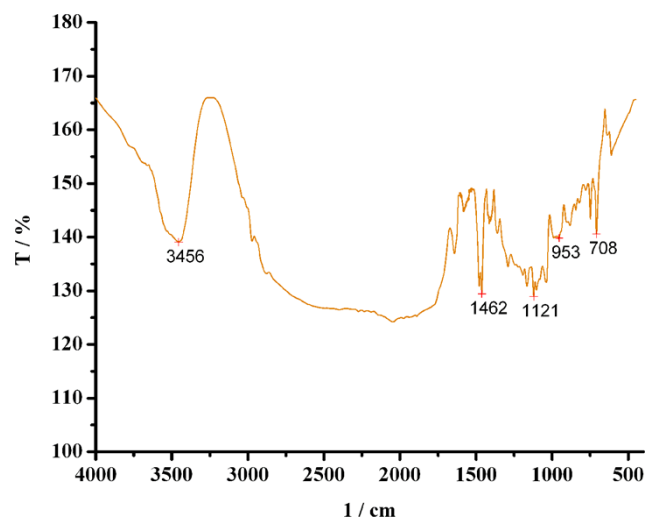

**Figure S3<sub>1</sub>.** IR spectra of complex 1

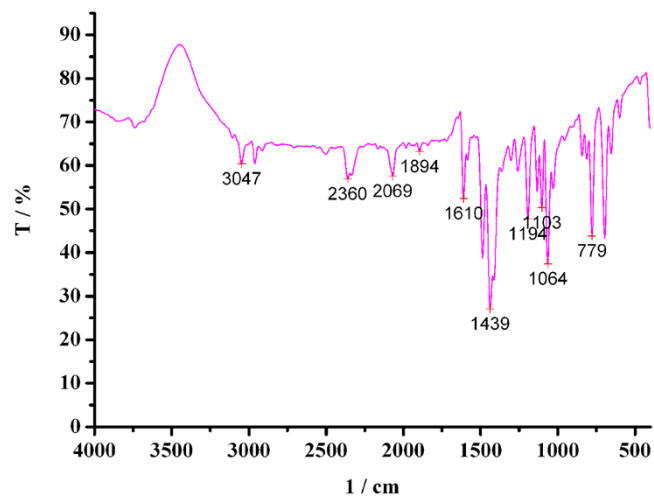

**Figure S3<sub>2</sub>.** IR spectra of complex 2

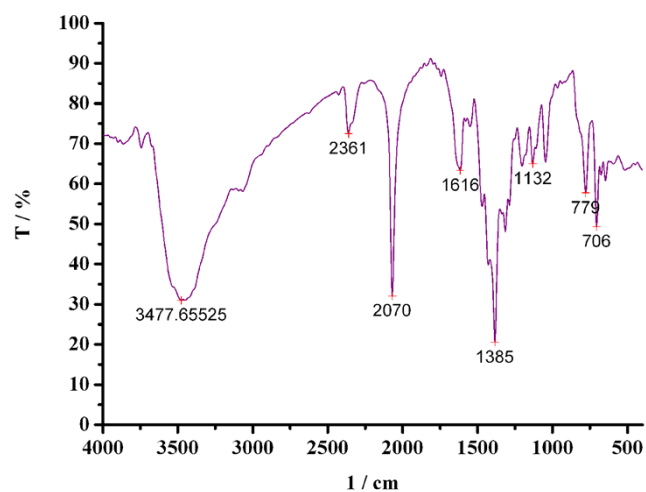

**Figure S3<sub>3</sub>.** IR spectra of complex 3

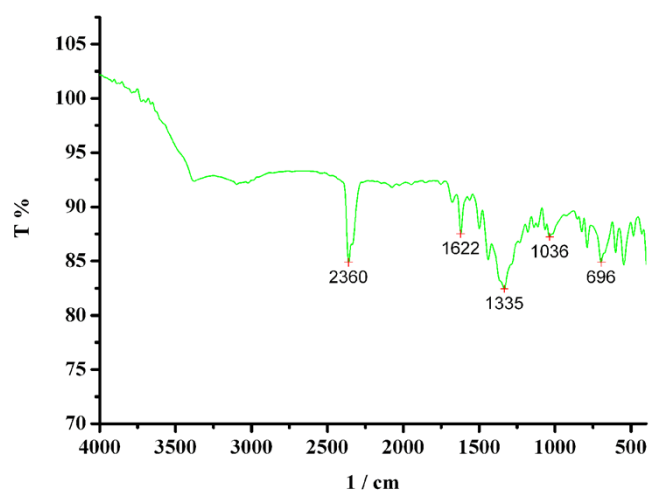

**Figure S3<sub>4</sub>.** IR spectra of complex 4

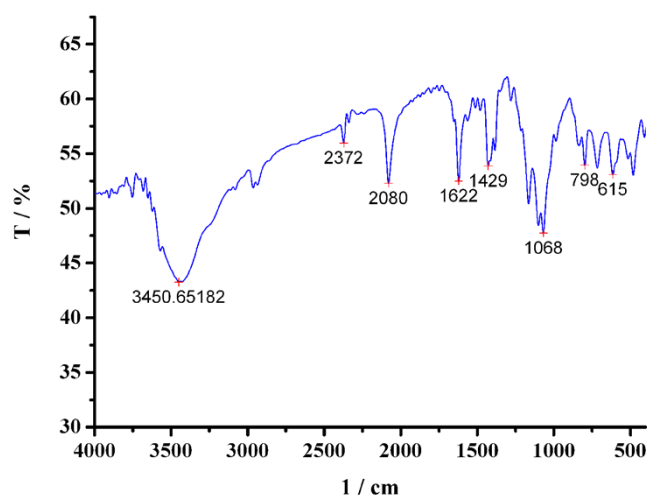

**Figure S3<sub>5</sub>.** IR spectra of complex 5

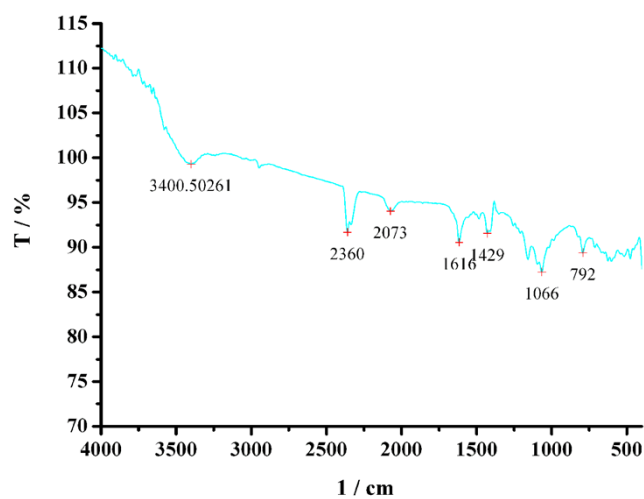

**Figure S3<sub>6</sub>.** IR spectra of complex 6

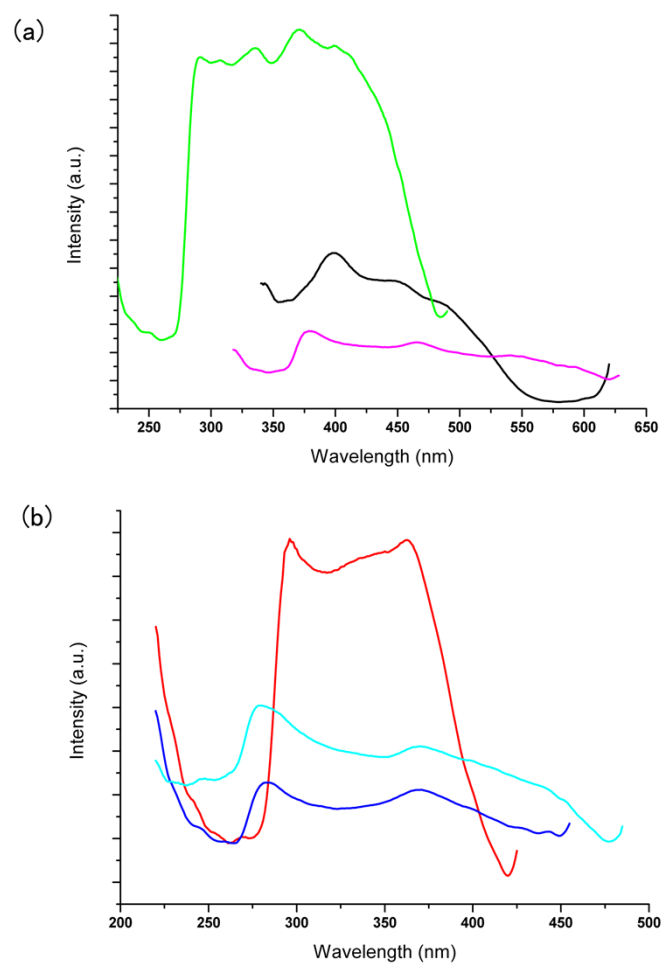

**Figure S4. (a)** Solid-state excitation spectra of complexes **1**, **3** and **6**. **1**: black; **3**: green; **6**: pink. **(b)** Solid-state excitation spectra of complexes **2**, **4** and **5**. **2**: red; **4**: blue; **5**: cyan.
